# Supplementary material for: Number of pregnancies and subsequent phenotype in a cross-sectional cohort of women with arrhythmogenic cardiomyopathy
Source: PubMed Central journal article supplement — Eur Heart J Cardiovasc Imaging. 2018 Apr 6;20(2):192–8. doi: 10.1093/ehjci/jey061 (PMC6343080; doi:10.1093/ehjci/jey061), 2018-04-06
Supplement: jey061_supplementary_table_s1.pdf [file jey061_supplementary_table_s1.pdf]

**Table S1: TFC major and minor criteria in AC women grouped by number of pregnancies**

|                                | 0<br>pregnancies<br>(n=19) | 1<br>pregnancy<br>(n=16) | 2<br>pregnancies<br>(n=30) | ≥3<br>pregnancies<br>(n=12) | <i>p-value</i><br><i>from</i><br><i>F test</i> | >0<br>pregnancies<br>(n=58) | <i>p-value</i><br><i>0 pregnancies vs</i><br><i>&gt;0 pregnancies</i> |
|--------------------------------|----------------------------|--------------------------|----------------------------|-----------------------------|------------------------------------------------|-----------------------------|-----------------------------------------------------------------------|
| AC severity score              | 4.3±2.8                    | 3.4±1.6                  | 4.7±2.8                    | 4.3±2.3                     | 0.53                                           | 2.1±2.2                     | 0.47                                                                  |
| Global or regional dysfunction |                            |                          |                            |                             |                                                |                             |                                                                       |
| Major TFC criteria (n, (%))    | 5 (26)                     | 2 (13)                   | 16 (53)                    | 4 (33)                      | 0.38                                           | 22 (38)                     | 0.41                                                                  |
| Minor TFC criteria (n, (%))    | 1 (5)                      | 1 (6)                    | 0 (0)                      | 0 (0)                       | 0.37                                           | 1 (2)                       | 0.44                                                                  |
| Tissue characterization        |                            |                          |                            |                             |                                                |                             |                                                                       |
| Major TFC criteria (n, (%))    | 1 (5)                      | 0 (0)                    | 0 (0)                      | 0 (0)                       | 0.61                                           | 0 (0)                       | 0.25                                                                  |
| Minor TFC criteria (n, (%))    | 1 (5)                      | 0 (0)                    | 0 (0)                      | 0 (0)                       | 0.61                                           | 0 (0)                       | 0.25                                                                  |
| Repolarization abnormalities   |                            |                          |                            |                             |                                                |                             |                                                                       |
| Major TFC criteria (n, (%))    | 8 (42)                     | 5 (31)                   | 12 (40)                    | 3 (25)                      | 0.79                                           | 20 (35)                     | 0.59                                                                  |
| Minor TFC criteria (n, (%))    | 0 (0)                      | 1 (6)                    | 1 (3)                      | 2 (17)                      | 0.21                                           | 4 (7)                       | 0.57                                                                  |
| Depolarization abnormalities   |                            |                          |                            |                             |                                                |                             |                                                                       |
| Major TFC criteria (n, (%))    | 4 (21)                     | 1 (6)                    | 4 (13)                     | 2 (17)                      | 0.71                                           | 7 (12)                      | 0.50                                                                  |
| Minor TFC criteria (n, (%))    | 2 (11)                     | 6 (38)                   | 7 (23)                     | 1 (8)                       | 0.19                                           | 14 (24)                     | 0.33                                                                  |

|                             |         |         |         |         |      |         |      |
|-----------------------------|---------|---------|---------|---------|------|---------|------|
| Arrhythmias                 |         |         |         |         |      |         |      |
| Major TFC criteria (n, (%)) | 3 (16)  | 0 (0)   | 3 (10)  | 3 (25)  | 0.18 | 6 (10)  | 0.68 |
| Minor TFC criteria (n, (%)) | 7 (37)  | 7 (44)  | 14 (47) | 3 (25)  | 0.64 | 24 (41) | 0.79 |
| Family history              |         |         |         |         |      |         |      |
| Major TFC criteria (n, (%)) | 15 (79) | 13 (81) | 25 (83) | 10 (83) | 0.98 | 48 (83) | 0.74 |
| Minor TFC criteria (n, (%)) | 0 (0)   | 0 (0)   | 0 (0)   | 1 (8)   | 0.16 | 1 (2)   | 1.0  |

P from chi-square or Fisher exact test as appropriate. AC = Arrhythmogenic cardiomyopathy; TFC = Task Force Criteria.
